# Supplementary material for: Role of mRNA Stability during Bacterial Adaptation
Source: PubMed Central journal article supplement (PMC3596320; doi:10.1371/journal.pone.0059059), 2013-03-13

Table S2: Composition of the culture medium

The lines separating the different products indicated those that are dissolved together. Values into brackets in front of  $\text{KH}_2\text{PO}_4$  and  $\text{K}_2\text{HPO}_4$  indicate the required concentrations to obtain a buffered media for pre-cultures.

| Product                              | Concentration (g/L) | Product                | Concentration (g/L) |
|--------------------------------------|---------------------|------------------------|---------------------|
| Glucose                              | 20                  | Isoleucine             | 0.025               |
| Sodium acetate                       | 1                   | Leucine                | 0.05875             |
| Ammonium citrate                     | 0.6                 | Valine                 | 0.04125             |
| $\text{KH}_2\text{PO}_4$             | 3 (9)               | Cysteine               | 0.17                |
| $\text{K}_2\text{HPO}_4$             | 2,5 (7,5)           | Phenylalanine          | 0.28                |
| $\text{MgCl}_2, 6\text{H}_2\text{O}$ | 0.2                 | Tyrosine               | 0.29                |
| $\text{FeSO}_4, 7\text{H}_2\text{O}$ | 0.011               | Adenine                | 0.05                |
| $\text{CaCl}_2, 2\text{H}_2\text{O}$ | 0.05                | Guanine                | 0.05                |
| $\text{ZnSO}_4, 7\text{H}_2\text{O}$ | 0.005               | Uracil                 | 0.05                |
| $\text{COCl}_2, 6\text{H}_2\text{O}$ | 0.0025              | Xanthin                | 0.05                |
| Alanine                              | 0.24                | P-aminobenzoic acid    | 0.01                |
| Arginine                             | 0.12                | Biotin                 | 0.01                |
| Asparagine                           | 0.34                | Cyano-cobalamine (B12) | 0.001               |
| Glutamine                            | 0.51                | Folic acid             | 0.01                |
| Glycine                              | 0.17                | Inosine                | 0.025               |
| Histidine                            | 0.11                | Nicotinic acid         | 0.001               |
| Lysine                               | 0.35                | Orotic acid            | 0.005               |
| Methionine                           | 0.12                | Ca panthotenate        | 0.001               |
| Proline                              | 0.68                | Pyridoxamine           | 0.005               |
| Serine                               | 0.34                | Pyridoxin (B6)         | 0.002               |
| Threonine                            | 0.23                | Riboflavin (B2)        | 0.001               |
| Tryptophan                           | 0.05                | Thiamine               | 0.001               |
|                                      |                     | D,L-6,8-thioctic acid  | 0.0025              |
|                                      |                     | Thymidine              | 0.025               |

Table II. Macrokinetic parameters of *L. lactis* continuous cultures at different growth rates.

|                                                |               |               |               |               |
|------------------------------------------------|---------------|---------------|---------------|---------------|
| D (h <sup>-1</sup> )                           | 0.09          | 0.24          | 0.35          | 0.47          |
| [X] (g/L)                                      | 0.76 +/- 0.02 | 0.79 +/- 0.01 | 0.75 +/- 0.01 | 0.75 +/- 0.01 |
| [isoleucine] (μM)                              | <10           | <10           | <10           | <10           |
| [glucose] (mM)                                 | 43.23 +/- 4   | 70.9 +/- 2    | 81.05 +/- 5   | 84.41 +/- 2   |
| [lactate] (mM)                                 | 116.52 +/- 6  | 77.57 +/- 4   | 57.12 +/- 6   | 51.85 +/- 2   |
| Y <sub>Gluc, Lact</sub><br>(mol Lact/mol Gluc) | 1.7           | 1.8           | 1.7           | 1.6           |
| qGluc (mmol/gX/h)                              | 8.28 +/- 1    | 12.99 +/- 1   | 15.81 +/- 2   | 20.25 +/- 1   |
| vLact (mmol/gX/h)                              | 13.33 +/- 1   | 22.47 +/-1    | 25.42 +/- 3   | 31.54 +/-1    |

D = dilution rate, [ ] = residual concentration, X = biomass, Y<sub>Gluc, Lact</sub> = lactate yield from glucose, qGluc = specific glucose consumption rate, vLact = specific lactate production rate.

Table III: Overlapping of the different transcriptional responses with different selection criteria on datasets.

| Compared conditions | Overlapping percentages |                     |                      |                 |               |               |
|---------------------|-------------------------|---------------------|----------------------|-----------------|---------------|---------------|
|                     | p-values <0.05          |                     |                      | ratios <1 or >1 |               |               |
|                     | ratios <1 or >1         | ratios <0.8 or >1.2 | ratios <0.67 or >1.5 | p-values<0.05   | p-values<0.03 | p-values<0.02 |
| μ and CS            | 29%                     | 29%                 | 31%                  | 29%             | 25%           | 21%           |
| μ and IS            | 24%                     | 23%                 | 20%                  | 24%             | 22%           | 22%           |
| μ and SR            | 10%                     | 9%                  | 5%                   | 10%             | 11%           | 9%            |
| SR and μ            | 16%                     | 15%                 | 8%                   | 16%             | 18%           | 14%           |
| SR and CS           | 15%                     | 15%                 | 17%                  | 15%             | 14%           | 11%           |
| SR and IS           | 68%                     | 70%                 | 72%                  | 68%             | 65%           | 59%           |

Values in percentage represent the fraction of common genes compared to the whole growth rate response (for the three first lines) or the whole stringent response (for the three last lines). Abbreviations: SR = stringent response regulon, CS = carbon starvation response, IS = isoleucine starvation response, μ = growth rate response

## Figures legends

Figure 1: Biomass production yields from amino acids in *L. lactis* IL1403 grown in continuous culture at different growth rates. Color code: □ = aspartic acid, ◻ = glutamic acid, ▨ = asparagine, ▩ = serine, ▧ = glutamine, ◼ = valine, ◻ = leucine, ◻ = isoleucine. Amino acids with positive yield are consumed by the bacteria whereas those with negative yields are produced.

Figure 2: Average expression profiles of genes classified in the different clusters following transcriptomic analysis of *L. lactis* IL1403 continuous culture at different growth rate. X axis: compared growth rate; Y axis: average expression ratios. Error bars represent the 5% confidence interval.

Figure 3: Distribution of genes from clusters C and D along *Lactococcus lactis* IL1403 chromosome. Dark bars indicate the global repartition of genes along the chromosome and the straight lines represent the normal repartition. Light grey and white bars are respectively representatives of the chromosomal localization of genes belonging to clusters C and D. Two division of the chromosome have been assessed: in 4 (upper graph) and 15 (lower graph) parts.

Figure 4: Venn diagrams comparing the growth rate transcriptomic response with other stress responses in *L. lactis* IL1403. Growth rate ( $\mu$ ) is compared with stringent response (SR) (a), isoleucine starvation (IS) (b), and carbon starvation (CS) (c). + and – respectively represents over- or under- expressed genes during IS, CS and SR. For  $\mu$  stimulon the variation sense of the genes previously selected (see Materials and methods) has been inverted. Missing genes of the different set of analysis have been removed. Numbers of genes in the various domains are specified on the graph.

Figure 5: Venn diagrams comparing the stringent transcriptomic response with other stress responses in *L. lactis* IL1403. Stringent response (SR) regulon is compared with isoleucine starvation (IS) and carbon starvation (CS) responses. + and – respectively represents over- and under- expressed genes in response to IS, CS or SR. Numbers of genes in the various domains are specified on the graph.

Figure 6. Ornithine biosynthesis pathways in *L. lactis*.

Ornithine can be synthesised either from glutamate or from arginine through the arginine deiminase pathway (ADI pathway). Thick arrows indicate up regulation of the corresponding genes upon growth rate decrease (down regulation upon growth rate increase).

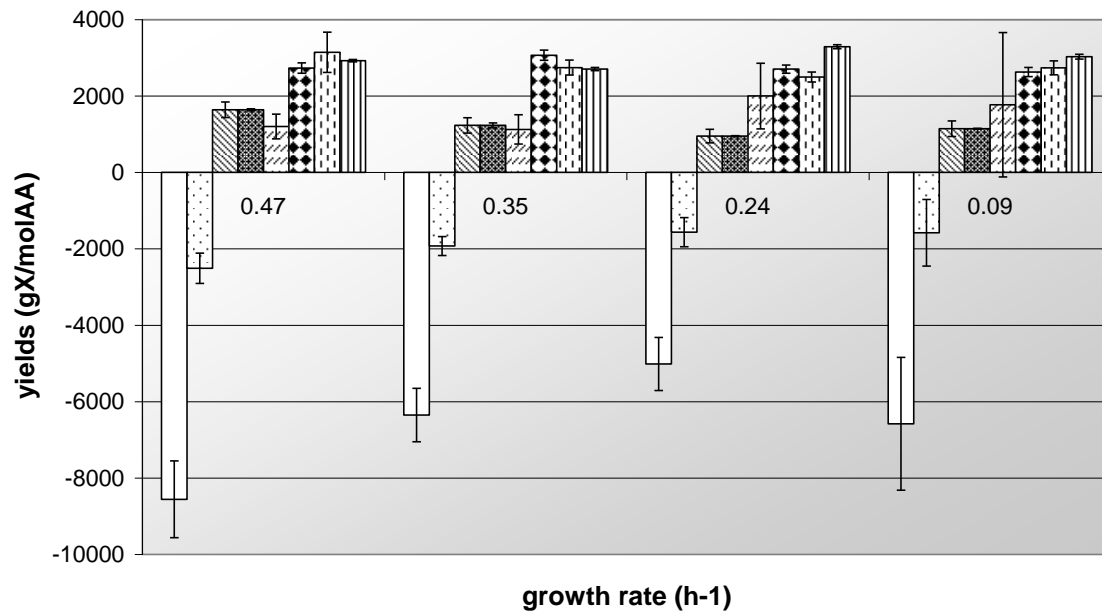

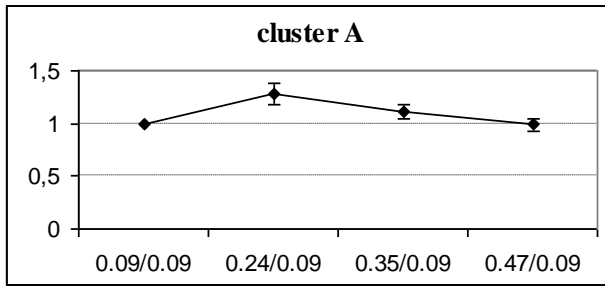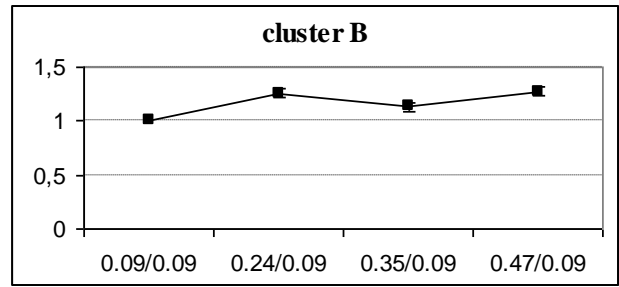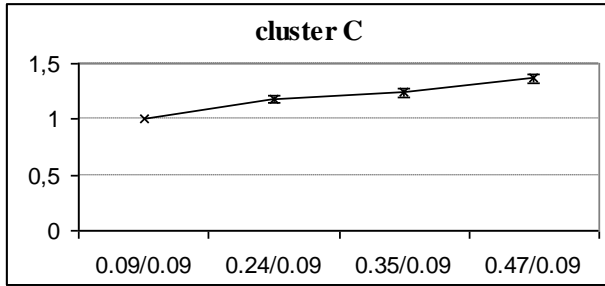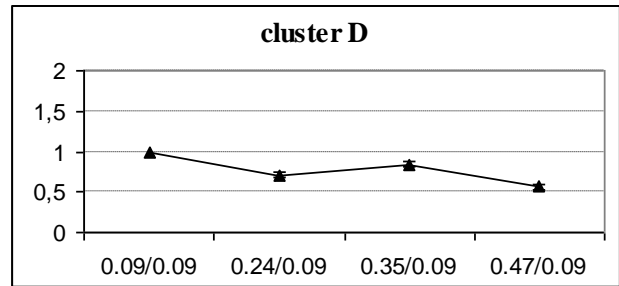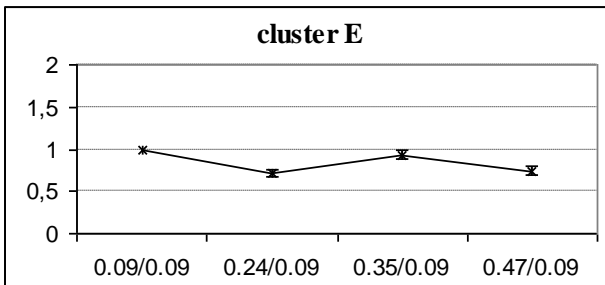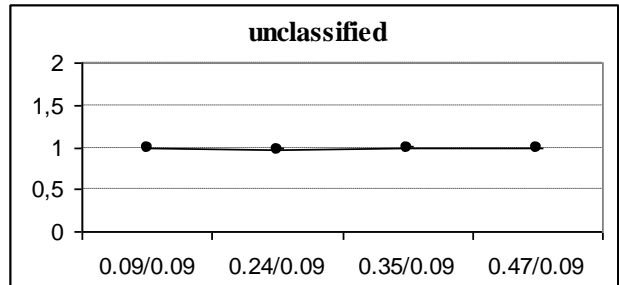

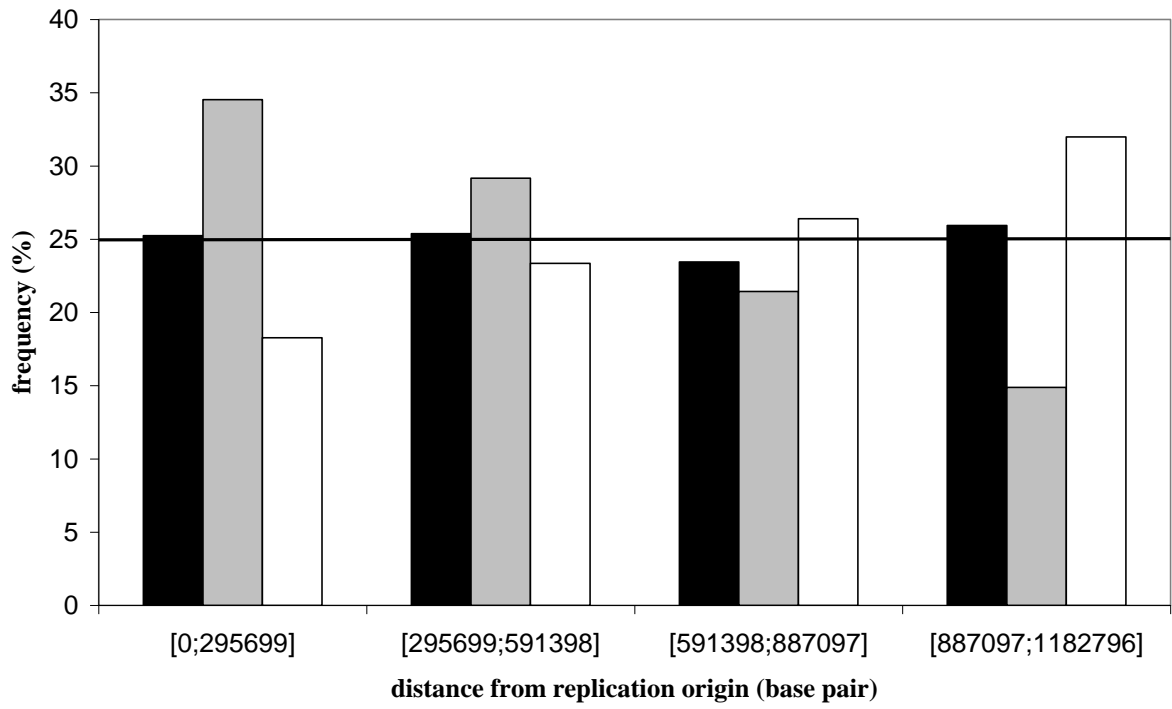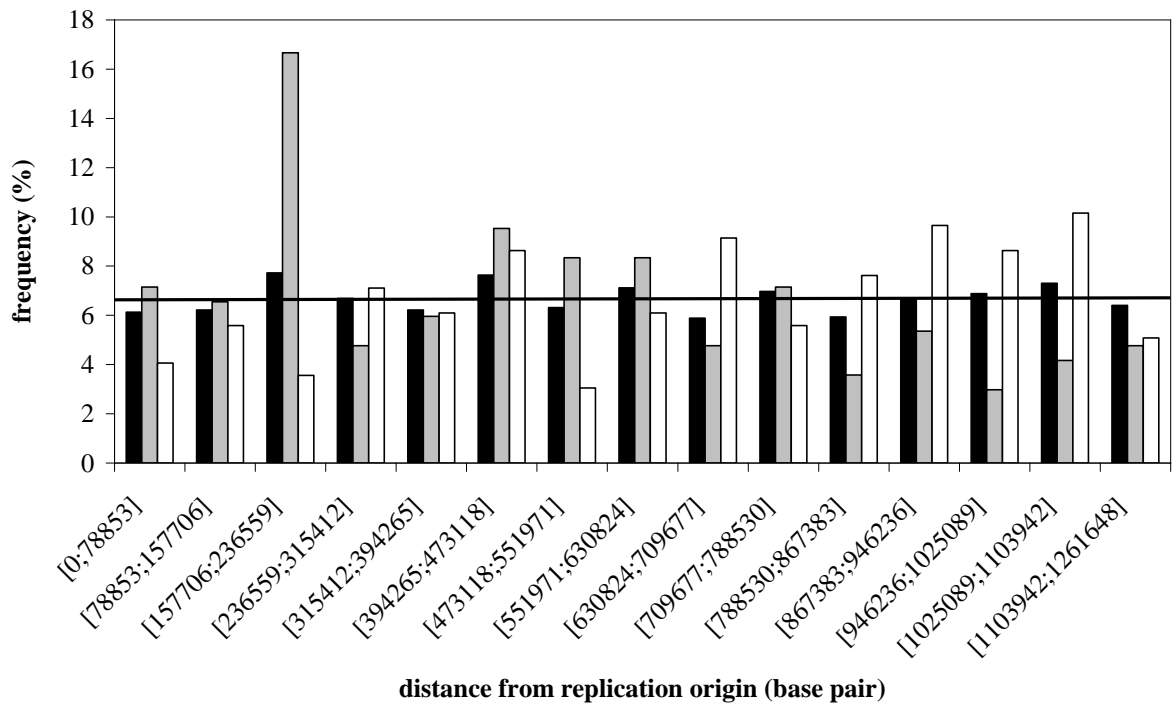

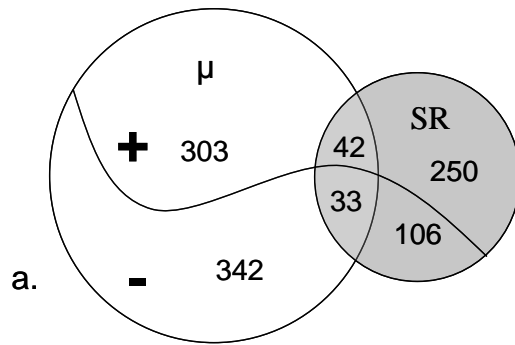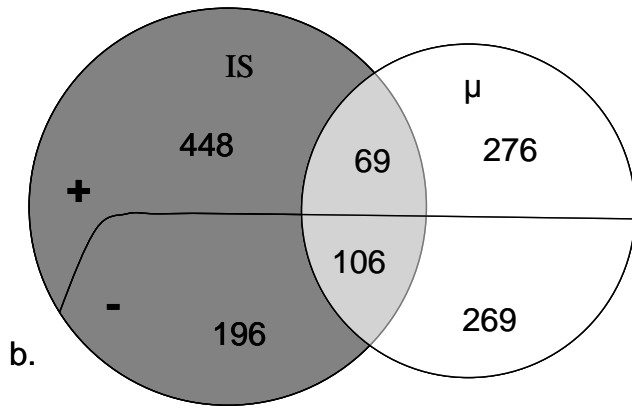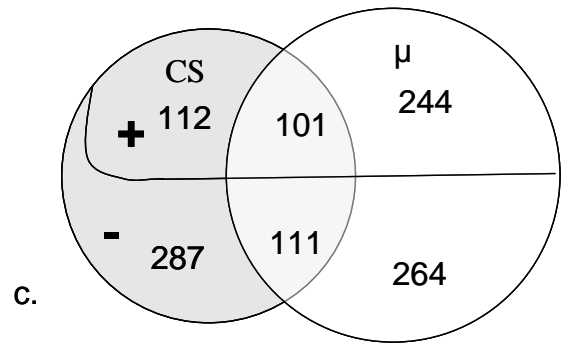



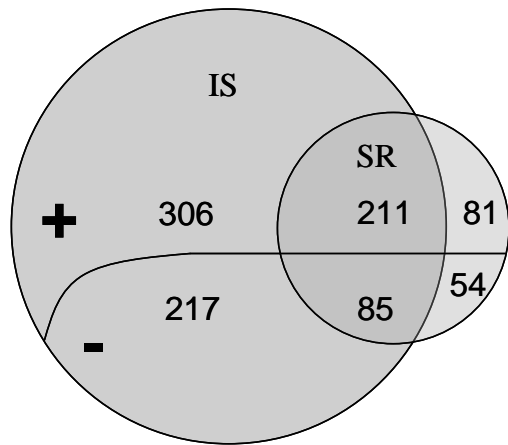

a.

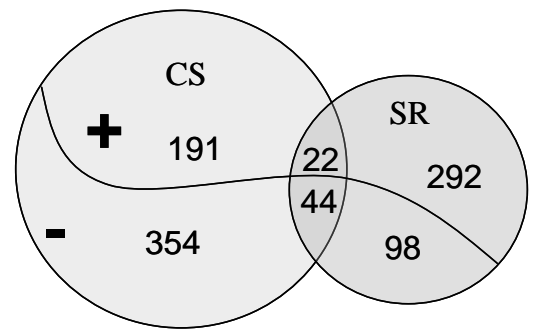

b.

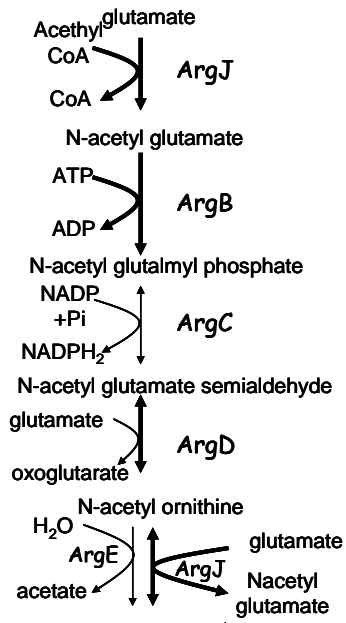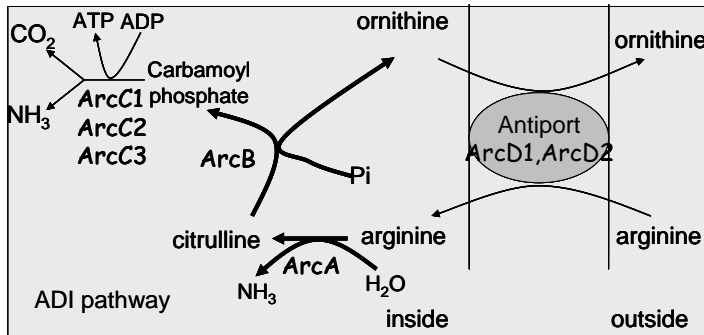

Supplement: pone.0059059.s003.pdf [file pone.0059059.s003.pdf]
