# Supplementary material for: Role of mRNA Stability during Bacterial Adaptation
Source: PubMed Central journal article supplement (PMC3596320; doi:10.1371/journal.pone.0059059), 2013-03-13

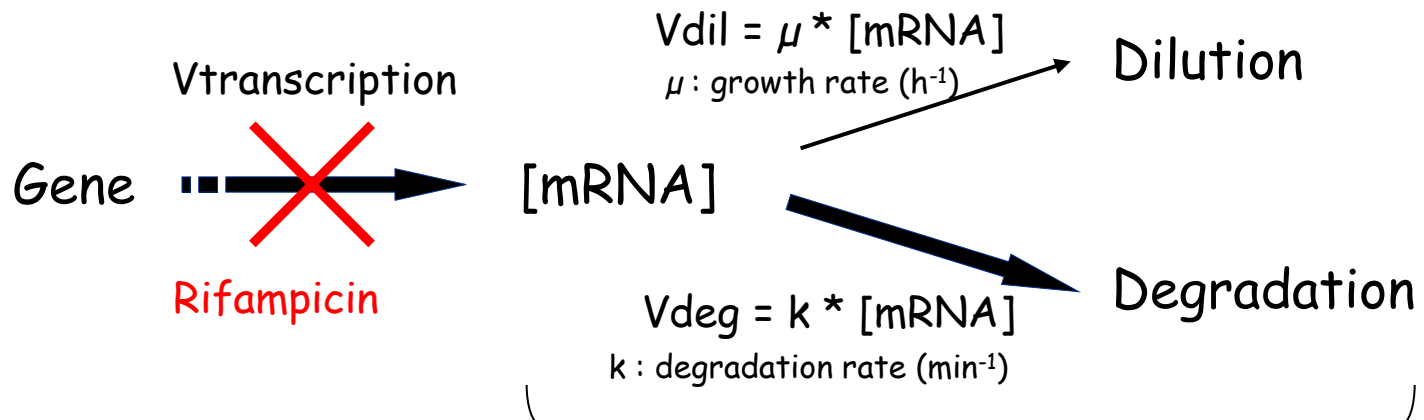

Time-course transcriptomic analysis  
 Home made micro-arrays for *L. lactis* IL1403

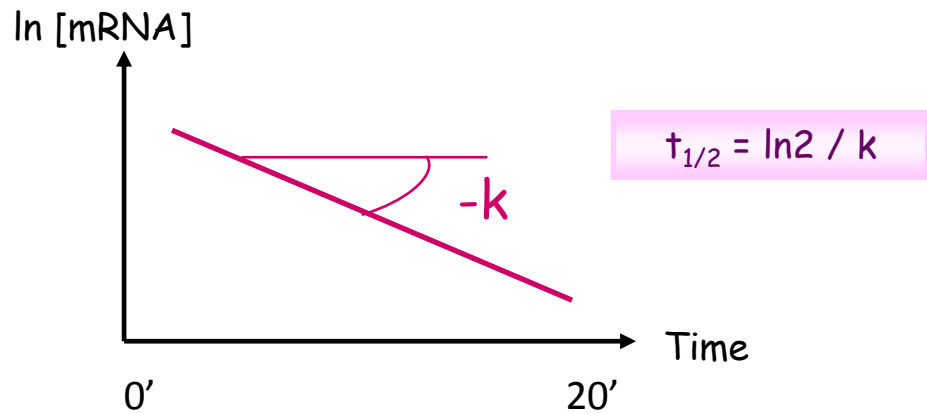

Supplement: pone.0059059.s001.pdf [file pone.0059059.s001.pdf]
